# Supplementary material for: Peptide Hydrolysate of Telfairia occidentalis Hook f. Seed Protein Promotes Effective Glucose Homeostasis by Improving β-cell Dysfunction and Abating Carbohydrate Metabolic Disturbance in Diabetic Rats
Source: Hindawi journal article supplement (doi:10.1155/2023/6652466), 2023-06-05

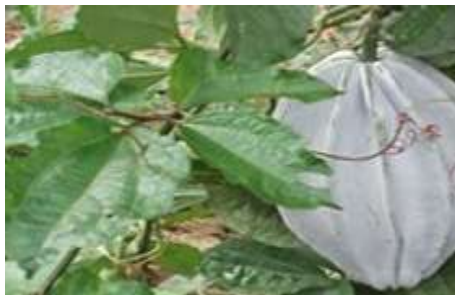

Protein isolate

Peptide hydrolysate

STZ

Type 2 Diabetes mellitus

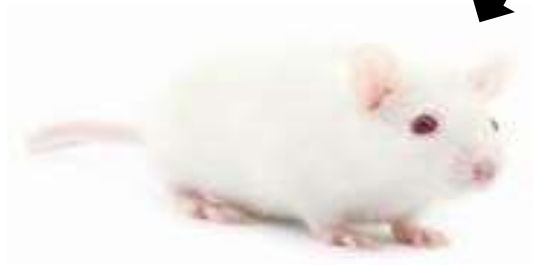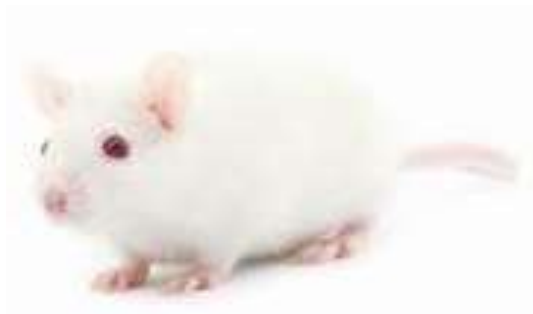

- Fasting serum glucose
- Total cholesterol
- Low density lipoprotein
- Triglyceride
- Glucose-6-phosphatase
- Insulin level
- Glycogen level
- Hexokinase activity
- Glucose-6-phosphate dehydrogenase
- Fructose-1, 6-biphosphatase
- High density lipoprotein

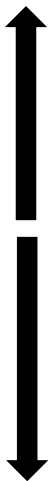

- Fasting serum glucose
- Total cholesterol
- Low density lipoprotein
- Triglyceride
- Glucose-6-phosphatase
- Insulin level
- Glycogen level
- Hexokinase activity
- Glucose-6-phosphate dehydrogenase
- Fructose-1, 6-biphosphatase
- High density lipoprotein

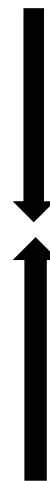

Supplement: f1 [file 6652466.f1.pdf]
